# Supplementary material for: Development and validation of Gaucher disease type 1 (GD1)-specific patient-reported outcome measures (PROMs) for clinical monitoring and for clinical trials
Source: PubMed Central journal article supplement (PMC8734239; doi:10.1186/s13023-021-02163-y), 2022-01-06
Supplement: 13023_2021_2163_MOESM1_ESM.pdf [file 13023_2021_2163_MOESM1_ESM.pdf]

# Clinical Practice/ Routine Monitoring Version Type 1 Gaucher Disease Patient Reported Outcome Measure (rmGD1-PROM)

**PART 1: Please complete each of the questions by putting a checkmark (✓) in the box which matches your best answer**

|                                                                                                                           | None<br>of the<br>time   | A little<br>of the<br>time | Some<br>of the<br>time   | Most of<br>the<br>time   | All of<br>the<br>time    | Not<br>applicable<br>or prefer<br>not to say |
|---------------------------------------------------------------------------------------------------------------------------|--------------------------|----------------------------|--------------------------|--------------------------|--------------------------|----------------------------------------------|
| 1 Over the past month, my Gaucher disease has restricted my education/job                                                 | <input type="checkbox"/> | <input type="checkbox"/>   | <input type="checkbox"/> | <input type="checkbox"/> | <input type="checkbox"/> | <input type="checkbox"/>                     |
| 2 Over the past month, my Gaucher disease has restricted my activities with friends                                       | <input type="checkbox"/> | <input type="checkbox"/>   | <input type="checkbox"/> | <input type="checkbox"/> | <input type="checkbox"/> | <input type="checkbox"/>                     |
| 3 Over the past month, my Gaucher disease has restricted my ability to have intimate relationships with my spouse/partner | <input type="checkbox"/> | <input type="checkbox"/>   | <input type="checkbox"/> | <input type="checkbox"/> | <input type="checkbox"/> | <input type="checkbox"/>                     |
| 4 Over the past month, my Gaucher disease has restricted my ability to take part in hobbies and leisure activities        | <input type="checkbox"/> | <input type="checkbox"/>   | <input type="checkbox"/> | <input type="checkbox"/> | <input type="checkbox"/> | <input type="checkbox"/>                     |
| 5 Over the past month, I have been concerned that I am an emotional burden to others because of my Gaucher disease        | <input type="checkbox"/> | <input type="checkbox"/>   | <input type="checkbox"/> | <input type="checkbox"/> | <input type="checkbox"/> | <input type="checkbox"/>                     |
| 6 Because of my Gaucher disease, I am concerned I will be at risk of bone disease                                         | <input type="checkbox"/> | <input type="checkbox"/>   | <input type="checkbox"/> | <input type="checkbox"/> | <input type="checkbox"/> | <input type="checkbox"/>                     |
| 7 Because of my Gaucher disease, I am concerned I will be at risk of cancers                                              | <input type="checkbox"/> | <input type="checkbox"/>   | <input type="checkbox"/> | <input type="checkbox"/> | <input type="checkbox"/> | <input type="checkbox"/>                     |
| 8 Because of my Gaucher disease, I am concerned I will be at risk of Parkinson's disease                                  | <input type="checkbox"/> | <input type="checkbox"/>   | <input type="checkbox"/> | <input type="checkbox"/> | <input type="checkbox"/> | <input type="checkbox"/>                     |
| 9 Because of my Gaucher disease, I am concerned I will be a financial burden                                              | <input type="checkbox"/> | <input type="checkbox"/>   | <input type="checkbox"/> | <input type="checkbox"/> | <input type="checkbox"/> | <input type="checkbox"/>                     |

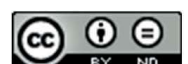

|                                                                               | None of the time         | A little of the time     | Some of the time         | Most of the time         | All of the time          | Not applicable or prefer not to say |
|-------------------------------------------------------------------------------|--------------------------|--------------------------|--------------------------|--------------------------|--------------------------|-------------------------------------|
| 10 I am concerned I will not get the best therapy because of budget issues    | <input type="checkbox"/> | <input type="checkbox"/> | <input type="checkbox"/> | <input type="checkbox"/> | <input type="checkbox"/> | <input type="checkbox"/>            |
| 11 I am concerned I may not have an expert physician for advice in the future | <input type="checkbox"/> | <input type="checkbox"/> | <input type="checkbox"/> | <input type="checkbox"/> | <input type="checkbox"/> | <input type="checkbox"/>            |
| 12 My non-Gaucher problems are more concerning than the Gaucher concerns      | <input type="checkbox"/> | <input type="checkbox"/> | <input type="checkbox"/> | <input type="checkbox"/> | <input type="checkbox"/> | <input type="checkbox"/>            |

|                                                                                                     | Strongly agree           | Agree                    | Neither agree nor disagree | Most of the time         | Disagree                 | Strongly disagree        |
|-----------------------------------------------------------------------------------------------------|--------------------------|--------------------------|----------------------------|--------------------------|--------------------------|--------------------------|
| 13 Over the past month, my health in general has improved because of my Gaucher-specific medication | <input type="checkbox"/> | <input type="checkbox"/> | <input type="checkbox"/>   | <input type="checkbox"/> | <input type="checkbox"/> | <input type="checkbox"/> |
| 14 Over the past month, all of my medical concerns have been Gaucher-related                        | <input type="checkbox"/> | <input type="checkbox"/> | <input type="checkbox"/>   | <input type="checkbox"/> | <input type="checkbox"/> | <input type="checkbox"/> |
| 15 Over the past month, my current medication has treated my Gaucher-specific concerns              | <input type="checkbox"/> | <input type="checkbox"/> | <input type="checkbox"/>   | <input type="checkbox"/> | <input type="checkbox"/> | <input type="checkbox"/> |

**PART 2: Thinking about your Gaucher disease over the past week, please circle the number that is right for you**

1. Over the past week, how **dependent** on others have you been because of your Gaucher disease?

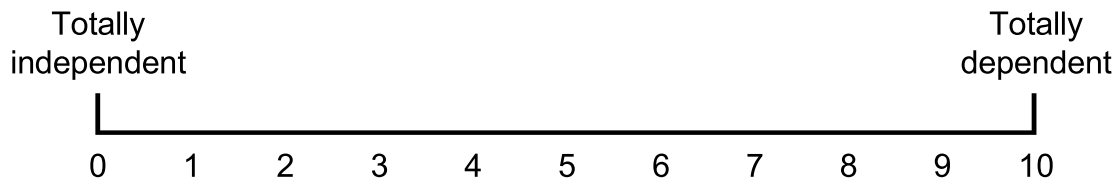

2. Over the past week, how **visibly big or swollen** has your **abdomen** looked because of your Gaucher disease?

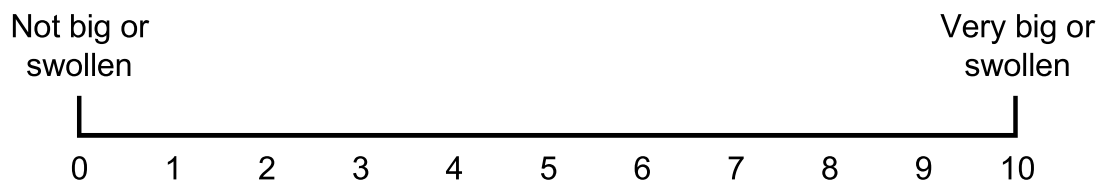

3. Over the past week, how **fatigued** have you been because of your Gaucher disease?

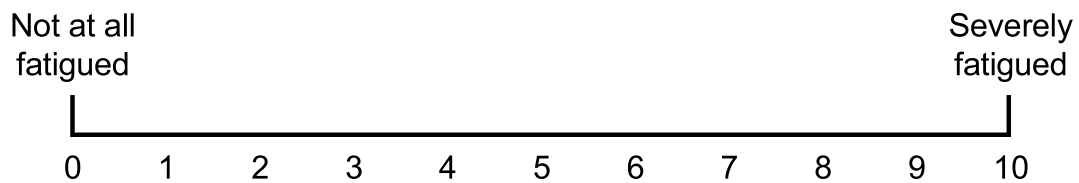

4. Over the past week, how **physically weak** have you been feeling because of your Gaucher disease?

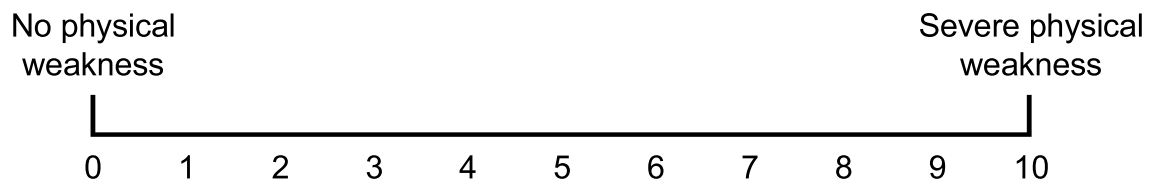

5. Over the past week, how severe has your **bone pain** been because of your Gaucher disease?

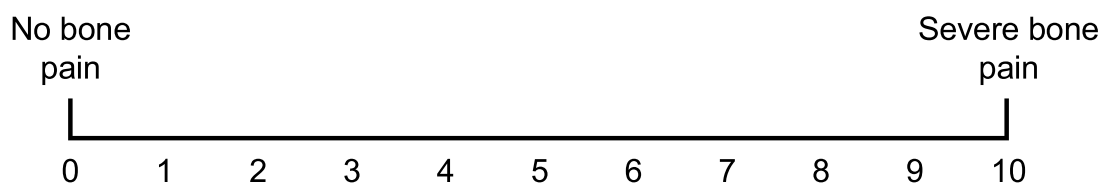

6. Over the past week, how **depressed** have you been because of your Gaucher disease?

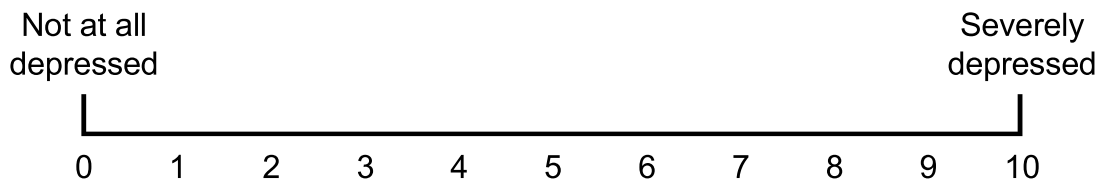

7. Over the past week, how **worried** have you been because of your Gaucher disease?

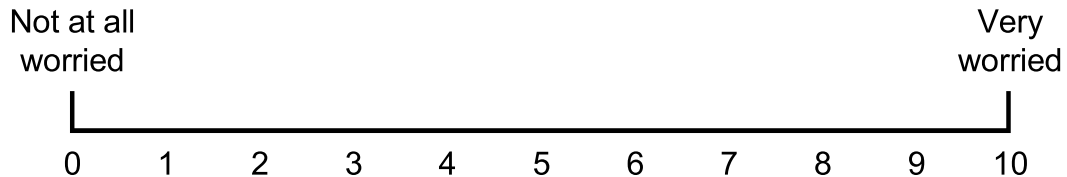

8. Over the past week, how have you felt about your **future** with Gaucher disease?

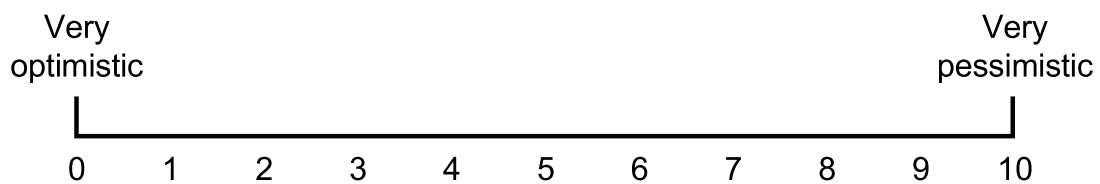

9. Over the past month, how **satisfied** have you been with your Gaucher medical treatment?

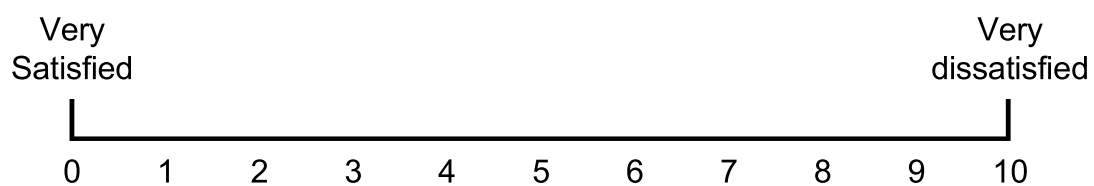

**Thank you for completing this form**
